# Supplementary material
Source: publisher site journal article supplement (https://www.dovepress.com/get_supplementary_file.php?f=204388.docx)
Supplement: Supplementary file 1 [file get_supplementary_file.php]

**Supplementary Table 1:** Therapeutic success (proportion of patients with a ≥10-point increase in PF-10 after approx. 6 weeks) in GOLD 1/2 versus GOLD 3/4 stage patients

| **GOLD spirometric classification** | |
| --- | --- |
| **GOLD 1/2** |  |
| n (%) | 2186 (64.1) |
| 95% CI | 62.4, 65.7 |
| **GOLD 3/4** | |
| n (%) | 2636 (70.9) |
| 95% CI | 69.4, 72.3 |

**Supplementary Figure 1:** Absolute change in PF-10 score between baseline and end of study in GOLD A (a), GOLD B (b), GOLD C (c), GOLD D patients (d) and all patient (e)

**A**

**B**

**D**

**C**

**E**
